# Supplementary material for: Boron Nitride as a Novel Support for Highly Stable Palladium Nanocatalysts by Atomic Layer Deposition
Source: Nanomaterials (Basel). 2018 Oct 18;8(10):849. doi: 10.3390/nano8100849 (PMC6215320; doi:10.3390/nano8100849)
Supplement: Supplementary file 1 [file nanomaterials-08-00849-s001.pdf]

## Supporting Information

### Boron Nitride as a novel support for highly stable Palladium nanocatalysts by Atomic Layer Deposition

Matthieu Weber,<sup>1</sup> Cassandre Lamboux,<sup>1</sup> Bruno Navarra,<sup>1</sup> Philippe Miele,<sup>1,2</sup> Sandrine Zanna,<sup>3</sup> Maxime Dufond,<sup>4</sup> Lionel Santinacci,<sup>4</sup> Mikhael Bechelany<sup>1,\*</sup>

<sup>1</sup> Institut Européen des membranes, IEM, UMR-5635, Univ Montpellier, CNRS, ENSCM, Montpellier, France.

<sup>2</sup> Institut Universitaire de France, 1 rue Descartes, 75231 Paris, France.

<sup>3</sup> PSL Research University, Chimie ParisTech - CNRS, Institut de Recherche de Chimie Paris, 75005, Paris, France.

<sup>4</sup> Aix Marseille Univ, CNRS, CINAM, Marseille, France.

\* Correspondence: [mikhael.bechelany@umontpellier.fr](mailto:mikhael.bechelany@umontpellier.fr)

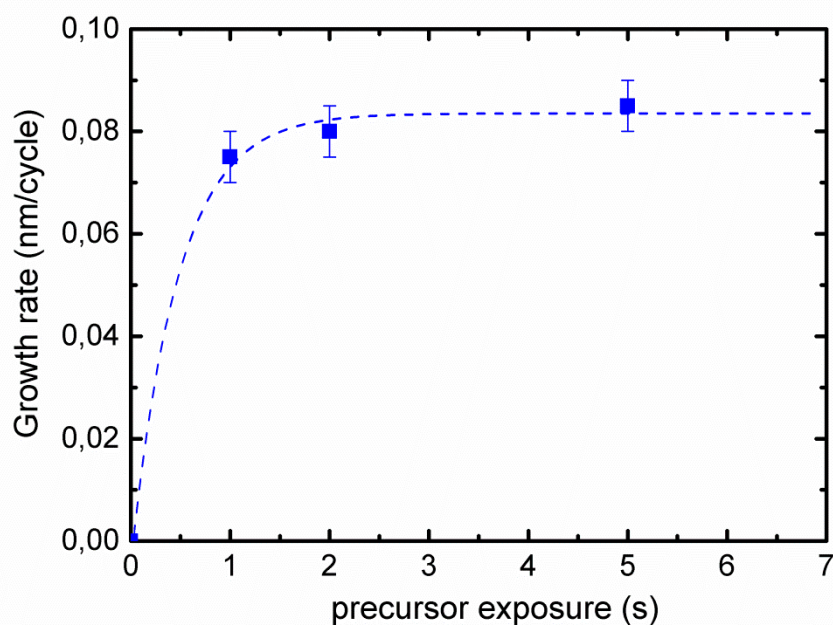

Figure S1: Saturation curve of the BN film growth as a function of the  $\text{BBr}_3$  exposure time, depicting the saturated growth of the film.

**Table S1:** Properties of BN films prepared by ALD using BBr<sub>3</sub> as precursor and NH<sub>3</sub> as co-reactant at 750°C. The substrates were Si(100) wafers and the substrate temperature was 750°C. In situ spectroscopic ellipsometry (SE), X-Ray reflectometry (XRR), atomic force microscopy (AFM), X-Ray photoelectron spectroscopy (XPS) measurements were used for the analysis. The films were 25 nm thick for all analysis.

| Properties                           | Value   | Analysis technique |
|--------------------------------------|---------|--------------------|
| Growth-per-cycle<br>(Å/cycle)        | 0.8±0.1 | SE                 |
| Mass density<br>(g/cm <sup>3</sup> ) | 2.2±0.3 | XRR                |
| RMS roughness<br>(nm)                | 3.5±2   | AFM                |
| C content<br>(at.%)                  | 4±3     | XPS                |
| O content<br>(at.%)                  | 7±3     | XPS                |

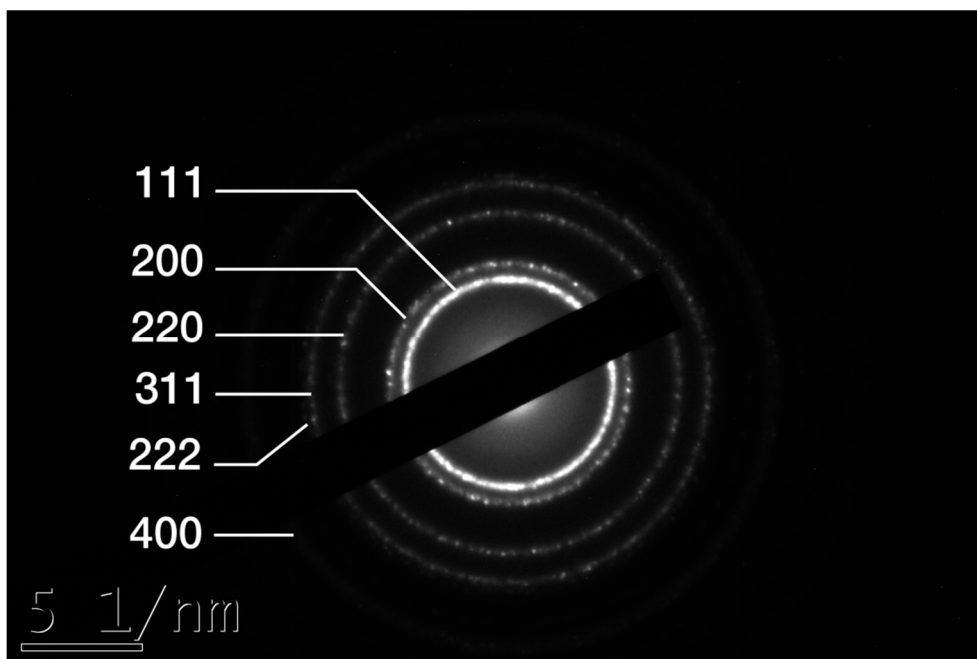

| <i>Crystal</i> | <i>Diameter of the<br/>diffraction rings (nm<sup>-1</sup>)</i> | <i>d (Å)</i> | <i>Crystal planes</i> |
|----------------|----------------------------------------------------------------|--------------|-----------------------|
| <i>Pd</i>      | <i>8.46</i>                                                    | <i>2.36</i>  | <i>111</i>            |
|                | <i>9.90</i>                                                    | <i>2.02</i>  | <i>200</i>            |
|                | <i>13.93</i>                                                   | <i>1.44</i>  | <i>220</i>            |
|                | <i>16.34</i>                                                   | <i>1.22</i>  | <i>311</i>            |
|                | <i>17.21</i>                                                   | <i>1.16</i>  | <i>222</i>            |
|                | <i>21.86</i>                                                   | <i>0.91</i>  | <i>400</i>            |

**Figure S2:** Selected area electron diffraction of a BN/Pd NPs sample prepared using 300 cycles of the Pd ALD process, corresponding to Figure 1c. The substrates used were Si<sub>3</sub>N<sub>4</sub> TEM windows covered with 15 nm of BN. The table corresponds to the indexing of the diffraction rings.
